# Supplementary material
Source: HighWire-hosted journal article supplement (https://bmjopen.bmj.com/content/10/6/e032573)
Supplement: inline-supplementary-material-1 [file inline-supplementary-material-1.pdf]

## APPENDIX A

## HND staff-validated tabular process maps and time estimates of each activity

| Process                          | Activity                          | Resource  | Duration |
|----------------------------------|-----------------------------------|-----------|----------|
| Physician Telephone consultation | Pre-consult preparation           | Physician | 5.0      |
|                                  | Re-booked call prep               | Physician | 4.2      |
|                                  | Call-back                         | Physician | 0.3      |
|                                  | Telephone consultation            | Physician | 7.0      |
|                                  | Post-consult chart update         | Physician | 10.0     |
| Team Conference                  | Pre-conference preparation        | Physician | 15.0     |
|                                  | Pre-conference preparation        | RN        | 1.0      |
|                                  | Team Conference                   | Physician | 21.0     |
|                                  | Team Conference                   | RN        | 14.0     |
|                                  | Team Conference                   | USK       | 7.0      |
|                                  | Post-conference chart update      | Physician | 15.0     |
| Nurse telephone consultation     | Pre-consult preparation           | RN        | 5.0      |
|                                  | Re-booked call prep               | RN        | 4.2      |
|                                  | Call-back                         | RN        | 0.3      |
|                                  | Telephone consultation            | RN        | 7.0      |
|                                  | Request support from physician    | RN        | 2.0      |
|                                  | Request support from physician    | Physician | 1.5      |
|                                  | Second Telephone consultation     | RN        | 0.3      |
|                                  | Post-consult chart update         | RN        | 7.0      |
| Team Visit                       | Booking the visit                 | USK       | 5.0      |
|                                  | Daily patient planning discussion | RN        | 25.0     |
|                                  | Daily patient planning discussion | USK       | 15.0     |
|                                  | Daily patient planning discussion | Physician | 12.0     |
|                                  | Arrange patient transport         | USK       | 15.0     |
|                                  | Data entry into registers         | RN        | 7.5      |
|                                  | Vitals                            | RN        | 7.5      |
|                                  | Patient Waits                     | Patient   | 10.0     |
|                                  | Discussion to plan visit          | RN        | 3.0      |
|                                  | Discussion to plan visit          | Physician | 3.0      |
|                                  | Pre-consult preparation           | RN        | 7.0      |
|                                  | Pre-consult preparation           | Physician | 9.0      |
|                                  | Physician & Nurse consultation    | RN        | 45.0     |
|                                  | Physician & Nurse consultation    | Physician | 45.0     |
|                                  | Post-consultation discussion      | RN        | 1.5      |
|                                  | Post-consultation discussion      | Physician | 1.5      |
|                                  | Post-consult chart update         | RN        | 7.0      |
|                                  | Post-consult chart update         | Physician | 10.0     |
|                                  | Booking of ordered tests          | USK       | 10.0     |
|                                  | Enter ordered prescriptions       | USK       | 10.0     |
|                                  | Follow-up Scheduling              | USK       | 12.5     |
| New Visit                        | Booking the visit                 | USK       | 5.0      |
|                                  | Daily patient planning discussion | RN        | 25.0     |
|                                  | Daily patient planning discussion | USK       | 15.0     |
|                                  | Daily patient planning discussion | Physician | 12.0     |

| Process         | Activity                          | Resource  | Duration |
|-----------------|-----------------------------------|-----------|----------|
|                 | Arrange patient transport         | USK       | 15.0     |
|                 | Data entry into registers         | RN        | 7.5      |
|                 | Vitals                            | RN        | 7.5      |
|                 | Patient Waits                     | Patient   | 10.0     |
|                 | Pre-consult preparation           | RN        | 7.0      |
|                 | Pre-consult preparation           | Physician | 9.0      |
|                 | Nurse Consultation                | RN        | 45.0     |
|                 | Physician Consultation            | Physician | 39.0     |
|                 | Post-consult chart update         | RN        | 10.0     |
|                 | Post-consult chart update         | Physician | 10.0     |
|                 | Booking of ordered tests          | USK       | 10.0     |
|                 | Enter ordered prescriptions       | USK       | 10.0     |
|                 | Follow-up Scheduling              | RN        | 5.0      |
|                 | Booking the visit                 | USK       | 5.0      |
| Physician Visit | Daily patient planning discussion | RN        | 25.0     |
|                 | Daily patient planning discussion | USK       | 15.0     |
|                 | Daily patient planning discussion | Physician | 12.0     |
|                 | Arrange patient transport         | USK       | 15.0     |
|                 | Data entry into registers         | RN        | 7.5      |
|                 | Vitals                            | USK       | 15.0     |
|                 | Patient Waits                     | Patient   | 10.0     |
|                 | Pre-consult preparation           | Physician | 5.0      |
|                 | Physician Consultation            | Physician | 39.0     |
|                 | Post-consult chart update         | Physician | 10.0     |
|                 | Booking of ordered tests          | USK       | 10.0     |
|                 | Enter ordered prescriptions       | USK       | 10.0     |
|                 | Follow-up Scheduling              | USK       | 12.5     |
|                 | Booking the visit                 | USK       | 5.0      |
|                 | Daily patient planning discussion | RN        | 25.0     |
| Nurse Visit     | Daily patient planning discussion | USK       | 15.0     |
|                 | Daily patient planning discussion | Physician | 12.0     |
|                 | Arrange patient transport         | USK       | 15.0     |
|                 | Vitals                            | RN        | 7.5      |
|                 | Patient Waits                     | Patient   | 10.0     |
|                 | Pre-consult preparation           | RN        | 7.0      |
|                 | Nurse Consultation                | RN        | 45.0     |
|                 | Post-consult chart update         | RN        | 10.0     |
|                 | Follow-up Scheduling              | RN        | 5.0      |
